# Supplementary material for: Catchment vegetation and temperature mediating trophic interactions and production in plankton communities
Source: PLoS One. 2017 Apr 17;12(4):e0174904. doi: 10.1371/journal.pone.0174904 (PMC5393547; doi:10.1371/journal.pone.0174904)
Supplement: S2 Text — (R) [file pone.0174904.s008.R]

########################################################################
#### RUNNING LOTKA-VOLTERRA-MODELS FROM R

setwd("~/Prosjekter/Arbeidsbord/TTG4/Nye versjoner")

library(R2jags)
bugs.dir <- "c:/WinBUGS14"


## SETTING UP MATRIXES FOR JAGS-MODELS; 
## NOTE THAT LAKE 2 IS REMOVED BEFORE ANALYSING THE DATA. THIS LAKE IS CLEARLY AN OUTLIER. 
## GENERAL RESULTS REMAIN UNCHANGED ALSO WHEN INCLUDING THIS LAKE

data2b <- data2[data2$dam!=2,]


n_period <- 4
n_dam <- 20
damlist <- sort(unique(data2b$dam))

## Zooo_b
Zoo_b <- matrix(NA, n_period, n_dam)
for(i in 1:n_dam){
  temp1 <- subset(data2b, dam==damlist[i])
  for (j in 1:n_period){
    temp2 <- temp1[which(temp1$period==j),]
    Zoo_b[j,i] <- temp2$B_zoo
  }
}


## Planter_b
phy_b <- matrix(NA, n_period, n_dam)
for(i in 1:n_dam){
  temp1 <- subset(data2b, dam==damlist[i])
  for (j in 1:n_period){
    temp2 <- temp1[which(temp1$period==j),]
    phy_b[j,i] <- temp2$chl_a_umL
  }
}


###########################################################################################
### LOTKA-VOLTERRA # 1; 
### 
### 
### 

## SETTING UP CO-VARIATE DATA

### PREPARING JAGS INPUT DATA AND INITIAL VALUES
bugs.data <- list(Zoo= Zoo_b, phy=phy_b, T=4, nrepl=20)


inits3 <- function() { list( Y= matrix(c(Zoo_b[1,], rep(NA, 60)), ncol=20, byrow=T), X=matrix(c(phy_b[1,], rep(NA, 60)), ncol=20, byrow=T), 
                             a = runif(1,0,1), e = runif(1,0.5,0.8), psi = runif(1,1.2,1.9)) }


### DEFINING NUMBER OF ITERATIONS ETC
niter <- 150000
nthin <- 3
nburn <- 50000
nchains <- 3

### RUNNING MODELS IN JAGS; 

M1 <- jags(data=bugs.data, inits=inits3, 
           parameters.to.save=c("a", "X", "Y",  "e", "psi", "m", "sigma.D", "sigma.P"), 
           model.file="LV1.bug",n.chain=nchains, n.iter=niter, 
           n.burnin=nburn, DIC=TRUE, working.directory=NULL, 
           jags.seed = 123, refresh = niter/50, progress.bar = "text", digits=5)

M1

### FIGURE FOR APPENDIX

windows()
traceplot(M1, varname=c("a", "m", "psi"), ask=F, mfrow=c(2,2))


###########################################################################################
### LOTKA-VOLTERRA # 2; 
### VANNKJEMI-EFFEKT ON PSI
### 
### 

## SETTING UP CO-VARIATE DATA
o <- order(data2b$dam)
data3 <- data2b[order(data2b$dam),]
Vann <- data3[which(data3$period==1), "totP_ugL"]


### PREPARING JAGS INPUT DATA AND INITIAL VALUES
bugs.data <- list(Zoo= Zoo_b, phy=phy_b, T=4, nrepl=20,Vann=(Vann-mean(Vann))/sd(Vann))


inits3 <- function() { list( Y= matrix(c(Zoo_b[1,], rep(NA, 60)), ncol=20, byrow=T), X=matrix(c(phy_b[1,], rep(NA, 60)), ncol=20, byrow=T), 
                             a = runif(1,0,1), e = runif(1,0.5,0.8), m = runif(1,0.05,0.1), alpha_psi = runif(1,1.2,1.9), beta_psi1 = runif(1, 1.5, 2)) }


### DEFINING NUMBER OF ITERATIONS ETC
niter <- 150000
nthin <- 3
nburn <- 50000
nchains <- 3

### RUNNING MODELS IN JAGS; 

M2 <- jags(data=bugs.data, inits=inits3, 
           parameters.to.save=c("a", "X", "Y", "a", "e", "psi", "m", "sigma.D", "sigma.P", "alpha_psi", "beta_psi"), 
           model.file="LV2.bug",n.chain=nchains, n.iter=niter, 
           n.burnin=nburn, DIC=TRUE, working.directory=NULL, 
           jags.seed = 123, refresh = niter/50, progress.bar = "text", digits=5)

M2

### FIGURE FOR APPENDIX

windows()
traceplot(M2, varname=c("a","m", "beta_psi"), ask=F, mfrow=c(2,2))

###########################################################################################
### LOTKA-VOLTERRA # 3; 
### VANNKJEMI-EFFEKT ON PSI
### 
### FISH-EFFEKT ON m

## SETTING UP CO-VARIATE DATA
o <- order(data2b$dam)
data3 <- data2b[order(data2b$dam),]
Vann <- data3[which(data3$period==1), "totP_ugL"]
Fish <- data3[which(data3$period==1), "Fish"]


### PREPARING JAGS INPUT DATA AND INITIAL VALUES
bugs.data <- list(Zoo= Zoo_b, phy=phy_b, T=4, nrepl=20, Fish=Fish+1, Vann=(Vann-mean(Vann))/sd(Vann))


inits3 <- function() { list( Y= matrix(c(Zoo_b[1,], rep(NA, 60)), ncol=20, byrow=T), X=matrix(c(phy_b[1,], rep(NA, 60)), ncol=20, byrow=T), 
                             a = runif(1,0,1), e = runif(1,0.5,0.8), mo = runif(2,0.05,0.1), alpha_psi = runif(1,1.2,1.9), beta_psi1 = runif(1, 1.5, 2)) }


### DEFINING NUMBER OF ITERATIONS ETC
niter <- 150000
nthin <- 3
nburn <- 50000
nchains <- 3

### RUNNING MODELS IN JAGS; 

M3 <- jags(data=bugs.data, inits=inits3, 
           parameters.to.save=c("alpha_psi", "mo", "X", "Y", "a", "e", "psi", "m", "sigma.D", "sigma.P", "beta_psi"), 
           model.file="LV3.bug",n.chain=nchains, n.iter=niter, 
           n.burnin=nburn, DIC=TRUE, working.directory=NULL, 
           jags.seed = 123, refresh = niter/50, progress.bar = "text", digits=5)

M3

### FIGURE FOR APPENDIX

windows()
traceplot(M3, varname=c("a","mo", "beta_psi"), ask=F, mfrow=c(3,2))


###########################################################################################
### LOTKA-VOLTERRA # 4; 
### VANNKJEMI-EFFEKT ON PSI
### TEMP-EFFEKT ON a - NORMAL-MODEL
### FISH-EFFEKT ON m

## SETTING UP CO-VARIATE DATA
o <- order(data2b$dam)
data3 <- data2b[order(data2b$dam),]
Temp <- data3[which(data3$period==1), "meantemp"]
Vann <- data3[which(data3$period==1), "totP_ugL"]
Fish <- data3[which(data3$period==1), "Fish"]


### PREPARING JAGS INPUT DATA AND INITIAL VALUES
bugs.data <- list(Zoo= Zoo_b, phy=phy_b, T=4, nrepl=20, Fish=Fish+1, Temp=(Temp-mean(Temp))/sd(Temp), Vann=(Vann-mean(Vann))/sd(Vann))


inits3 <- function() { list( Y= matrix(c(Zoo_b[1,], rep(NA, 60)), ncol=20, byrow=T), X=matrix(c(phy_b[1,], rep(NA, 60)), ncol=20, byrow=T), 
                             alpha_c = runif(1,0,0.01), e = runif(1,0.5,0.8), beta_c=runif(1, -0.006, -0.004),  
                             mo = runif(2,0.05,0.1), alpha_psi = runif(1,1.2,1.9), beta_psi = runif(1, 1.5, 2)) }


### DEFINING NUMBER OF ITERATIONS ETC
niter <- 250000
nthin <- 3
nburn <- 100000
nchains <- 3

### RUNNING MODELS IN JAGS; 

M4 <- jags(data=bugs.data, inits=inits3, 
                parameters.to.save=c("alpha_c", "alpha_psi", "mo", "X", "Y", "a", "e", "psi", "m", "sigma.D", "sigma.P", "beta_c", "beta_psi"), 
                model.file="LV4.bug",n.chain=nchains, n.iter=niter, 
                n.burnin=nburn, DIC=TRUE, working.directory=NULL, 
                jags.seed = 123, refresh = niter/50, progress.bar = "text", digits=5)

M4

## PROBABILITY THAT beta_a IS LESS THAN 0

round(ecdf(M4$BUGSout$sims.list$beta_c)(0),2)

### FIGURE FOR APPENDIX

windows()
traceplot(M4, varname=c("alpha_c","beta_c","mo", "alpha_psi","beta_psi"), ask=F, mfrow=c(3,2))

#######################################################################################################
### FIGURE 2 IN MANUSCRIPT; 
library(ade4)

## p-EFFECT ON PSI; 
x_vann <- seq(min(bugs.data$Vann), max(bugs.data$Vann), length.out=1000)
y_vann <- exp(M4$BUGSoutput$mean$alpha_psi+(x_vann*M4$BUGSoutput$mean$beta_psi))

## FISH-EFFECT ON m

mo1 <- quantile(M4$BUGSout$sims.list$mo[,1], prob=c(0.025, 0.25, 0.5, 0.75, 0.975))
mo2 <- quantile(M4$BUGSout$sims.list$mo[,2], prob=c(0.025, 0.25, 0.5, 0.75, 0.975))


## TEMP-EFFECT ON A
x_temp <- seq(min(bugs.data$Temp), max(bugs.data$Temp), length.out=1000)
y_temp <- M4$BUGSoutput$mean$alpha_c+(x_temp*M4$BUGSoutput$mean$beta_c)


###


## P-effect on psi
windows(height=5, width=8)
par(bty="l", cex=1.4)
plot(x_vann, y_vann, type="l", ylab=expression(psi), xlab="Stand. P load", lwd=2, col="dark blue")
mtext(side=3, "B)", line=2, adj=0.01, cex=1.5)
add.scatter(hist((M4$BUGSout$sims.list$beta_psi), col="blue", main=expression(beta[psi]), xlab="", ylab="", yaxt="n"),inset=c(0.1, 0.35))


## Fish-effect on m
windows(height=5, width=8)
par(bty="l", cex=1.4)
par(bty="l")
plot(x=c(0.25,0.25), y=mo1[c(1,5)], type="l", lwd=3, col="dark orange", xlim=c(0,1), xaxt="n", ylim=c(0, 0.8), xlab="", ylab="Mortality (m)")
lines(x=c(0.25,0.25), y=mo1[c(2,4)], col="grey", lwd=3)
points(x=c(0.25), y=mo1[3], col="black", pch=16)

lines(x=c(0.75,0.75), y=mo2[c(1,5)],lwd=3, col="dark orange")
lines(x=c(0.75,0.75), y=mo2[c(2,4)], col="grey", lwd=3)
points(x=c(0.75), y=mo2[3], col="black", pch=16)

axis(side=1, at=c(0.25, 0.75), label=c("Without fish", "With fish"))
mtext(side=3, "A)", line=2, adj=0.01, cex=1.5)

## Temp-effect on a
windows(height=5, width=8)
par(bty="l", cex=1.4)
plot(x_temp, y_temp, type="l", ylab=expression(c), xlab="Stand. temperature", lwd=2, col="dark grey")
mtext(side=3, "C)", line=2, adj=0.01, cex=1.5)
add.scatter(hist((M4$BUGSout$sims.list$beta_c), col="grey", main=expression(beta[c]), xlab="", ylab="", xlim=c(-0.02, 0.02), yaxt="n"), posi="topright")

###################################################################
### COVAR BETWEEN COVARIATES: 
o <- order(data2b$dam)
data3 <- data2b[order(data2b$dam),]
Temp <- data3[which(data3$period==1), "meantemp"]
Vann <- data3[which(data3$period==1), "totP_ugL"]
Fish <- data3[which(data3$period==1), "Fish"]


## WATER VS FISH
M1 <- lm(Vann~as.factor(Fish)-1)
M1b <- lm(Vann~1)
AIC(M1, M1b)
anova(M1, M1b)

## TEMP VS FISH
M2 <- lm(Temp~as.factor(Fish)-1)
M2b <- lm(Temp~1)
AIC(M2, M2b)
anova(M2, M2b)


###################################################################
### TIME SERIES PLOT FOR APPENDIX


t <- i
Lid <- c(1, seq(3,21))

windows()
par(mfrow=c(5,4))

for(t in 1:20){
  par(mar=c(2,2,2,2))  
  plot(M4$BUGSout$mean$Y[,t], type="l", xlab="", ylab="", ylim=c(0, 200))
  lines(Zoo_b[,t], col=2)
  text(1.5, 150, paste("lake", Lid[t], sep=" "))
}

windows()
par(mfrow=c(5,4))

for(t in 1:20){
  par(mar=c(2,2,2,2))  
  plot(M4$BUGSout$mean$X[,t], type="l", xlab="", ylab="", ylim=c(0, 3))
  lines(phy_b[,t], col=2)
  text(1.5, 2.5, paste("lake", Lid[t], sep=" "))
}
