# Supplementary material for: Catchment vegetation and temperature mediating trophic interactions and production in plankton communities
Source: PLOS journal article supplement (doi:10.1371/journal.pone.0174904), 2017-04-17
Supplement: S3 (10.1371/journal.pone.0174904.s003) [file journal.pone.0174904.s003]

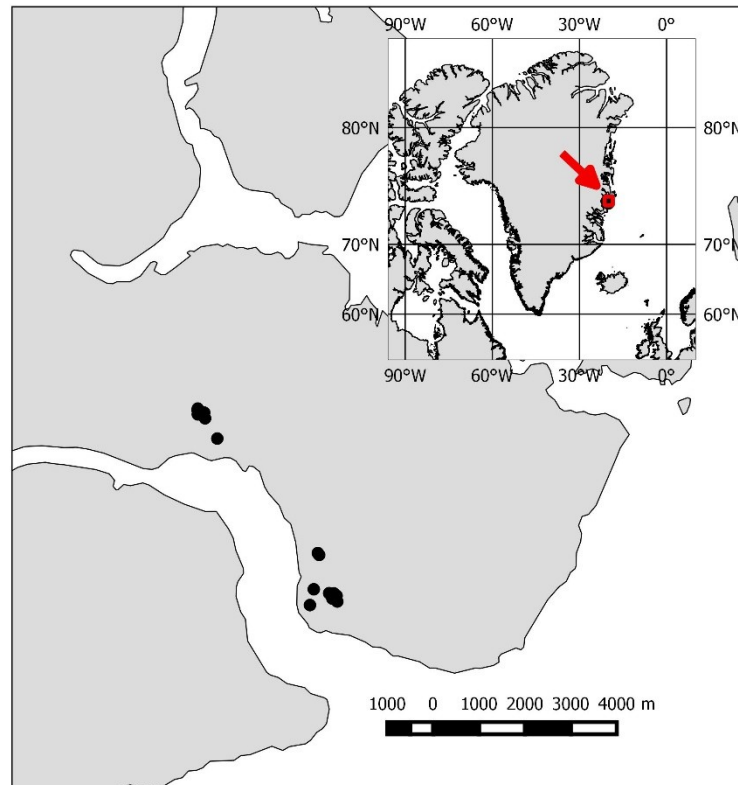

**Fig S1:** Map of study area in Northeast Greenland with black dots indicating individual study sites sampled for phytoplankton, zooplankton, water chemistry, temperature and catchment vegetation cover during the summer 2013. An online presentation, including site-specific details is found on <https://goo.gl/DnzBLM> (DOI: 10.5281/zenodo.31268). Figure made using QGIS version 2.12.2-Lyon; URL <http://qgis.org>. © OpenStreetMap contributors, URL <http://www.openstreetmap.org/copyright/en>.
