# Supplementary material for: Catchment vegetation and temperature mediating trophic interactions and production in plankton communities
Source: PLOS journal article supplement (doi:10.1371/journal.pone.0174904), 2017-04-17
Supplement: S6 (10.1371/journal.pone.0174904.s006) [file journal.pone.0174904.s006]

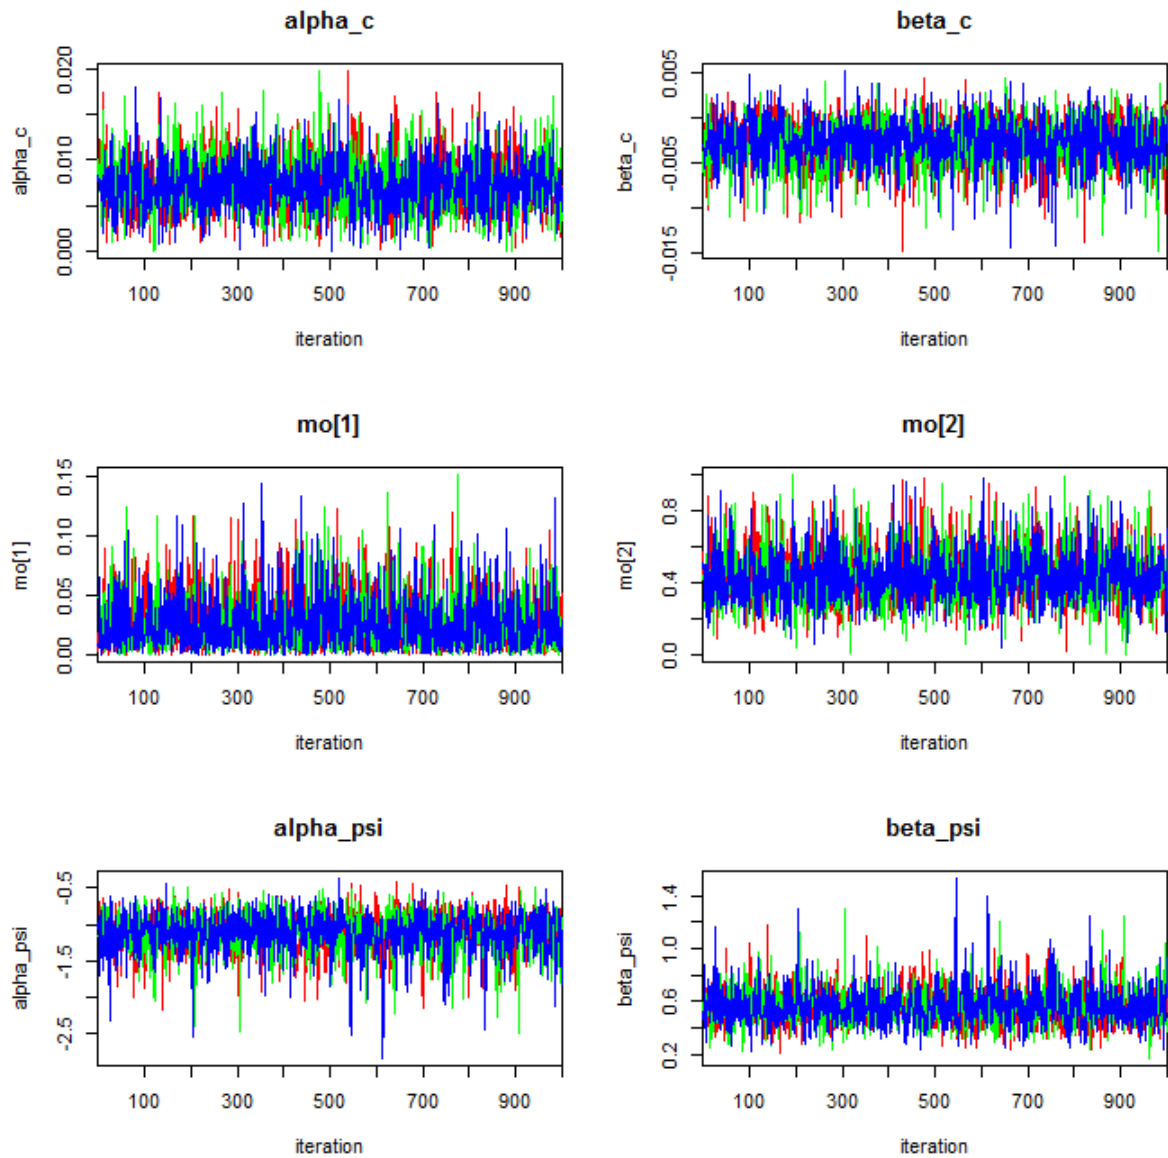

**Fig. S5.** Plot of iterations vs. sampled values for model parameters in the MCMC chains. The three different chains are plotted using different colours. Plots were generated using function *traceplot* in add-on library R2jags (Su, Y.-S. and M. Yajima, 2015. "R2jags: Using R to Run 'JAGS'." <http://CRAN.R-project.org/package=R2jags>).
